# Supplementary material for: Low-dose immune challenges result in detectable levels of oxidative damage
Source: Oxford University Press journal article supplement (doi:10.1242/jeb.220095), 2020-01-01
Supplement: jeb220095supp.pdf [file jeb220095supp.pdf]

Table S1. Correlation analysis of all dependent variables. Spleen mass, spleen-somatic index, amount of biliverdin in the spleen, and biliverdin concentration in the liver were inverse-transformed; biliverdin concentration in the spleen, glycerol and free triglyceride concentration, heme oxygenase expression in the liver and blood were log-transformed; d-ROMs was square-root transformed; and OXY was cubed to achieve normality.

[Click here to Download Table S1](#)
